# Supplementary material
Source: Research Square preprint supplement (doi:10.21203/rs.3.rs-9086032/v1)
Supplement: Supplementary file 1 [file 83f035b224224e618d3f7ce8.docx]

**Supplementary Figures**


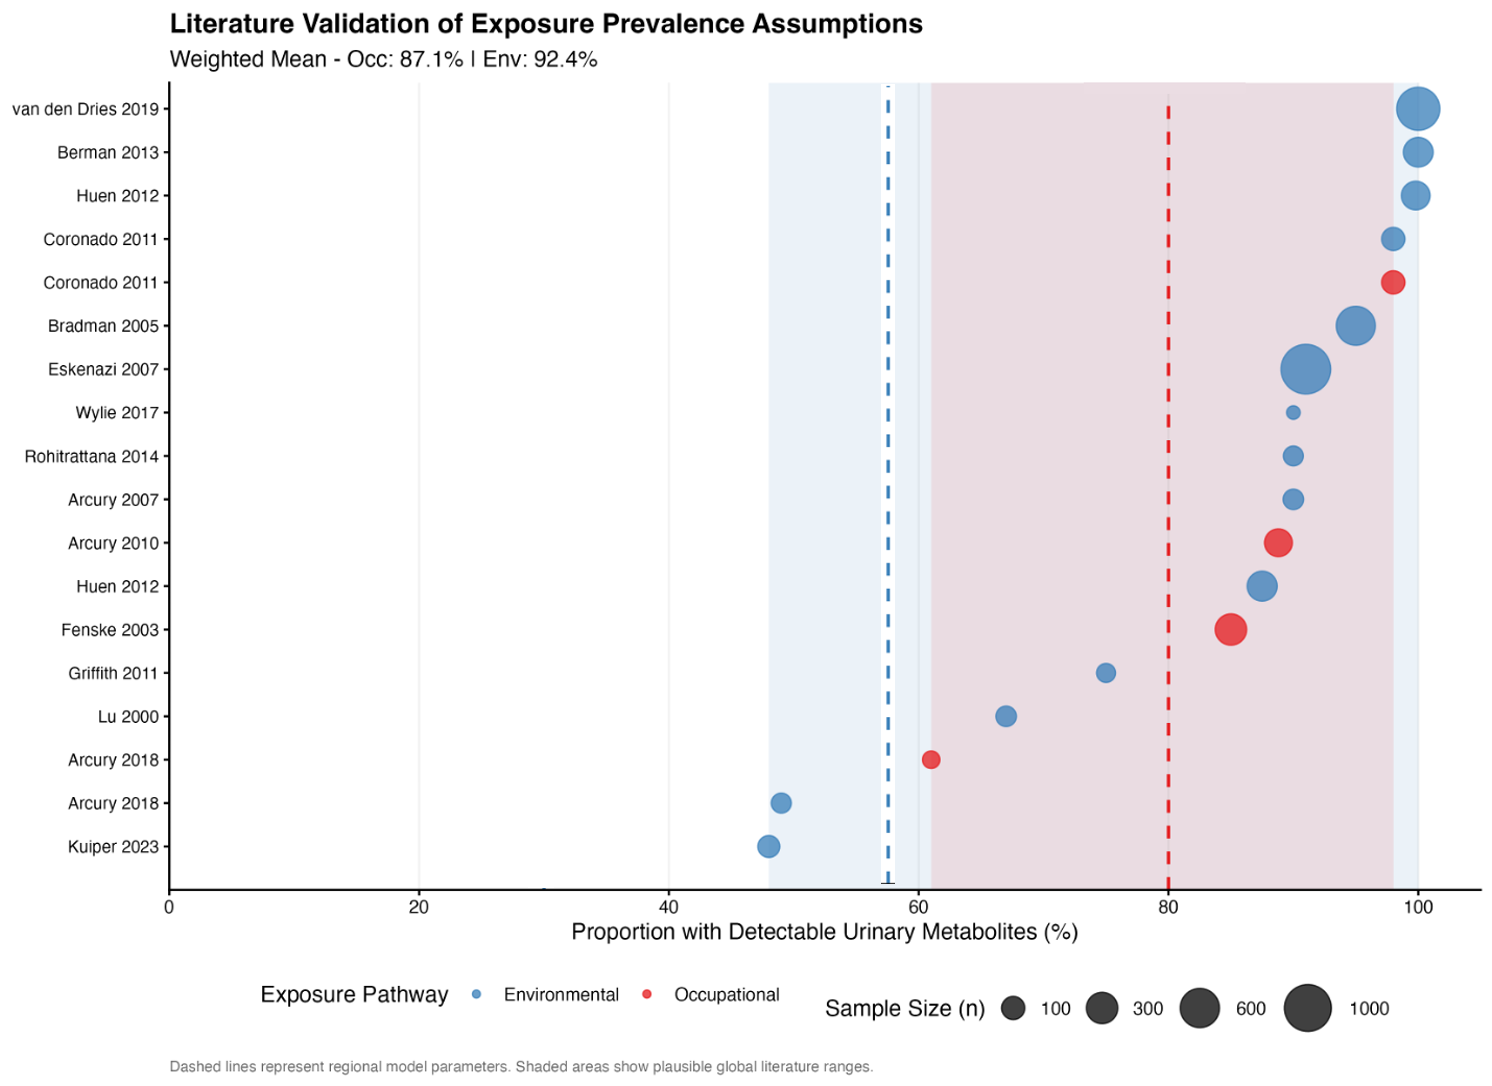


***Supplementary Figure 1. Literature validation of pesticide exposure prevalence assumptions using biomonitoring studies.*** *Dot plot shows proportion of individuals with detectable urinary organophosphate metabolites in 18 estimates from 15 published studies (2000-2023), stratified by exposure pathway. Point size scaled by sample size (n=17-1,163). Occupational pathway (red, n=5 estimates): farmworkers and agricultural workers. Environmental pathway (blue, n=13 estimates): rural residents, pregnant women in agricultural areas, children in farmworker households. Vertical dashed lines indicate study assumptions: 80% occupational exposure (red) and 58% environmental exposure (blue). Shaded background regions represent observed ranges from literature (red: 61-98%; blue: 48-100%). Weighted means (by sample size): occupational 83.9%, environmental 85.1%.*


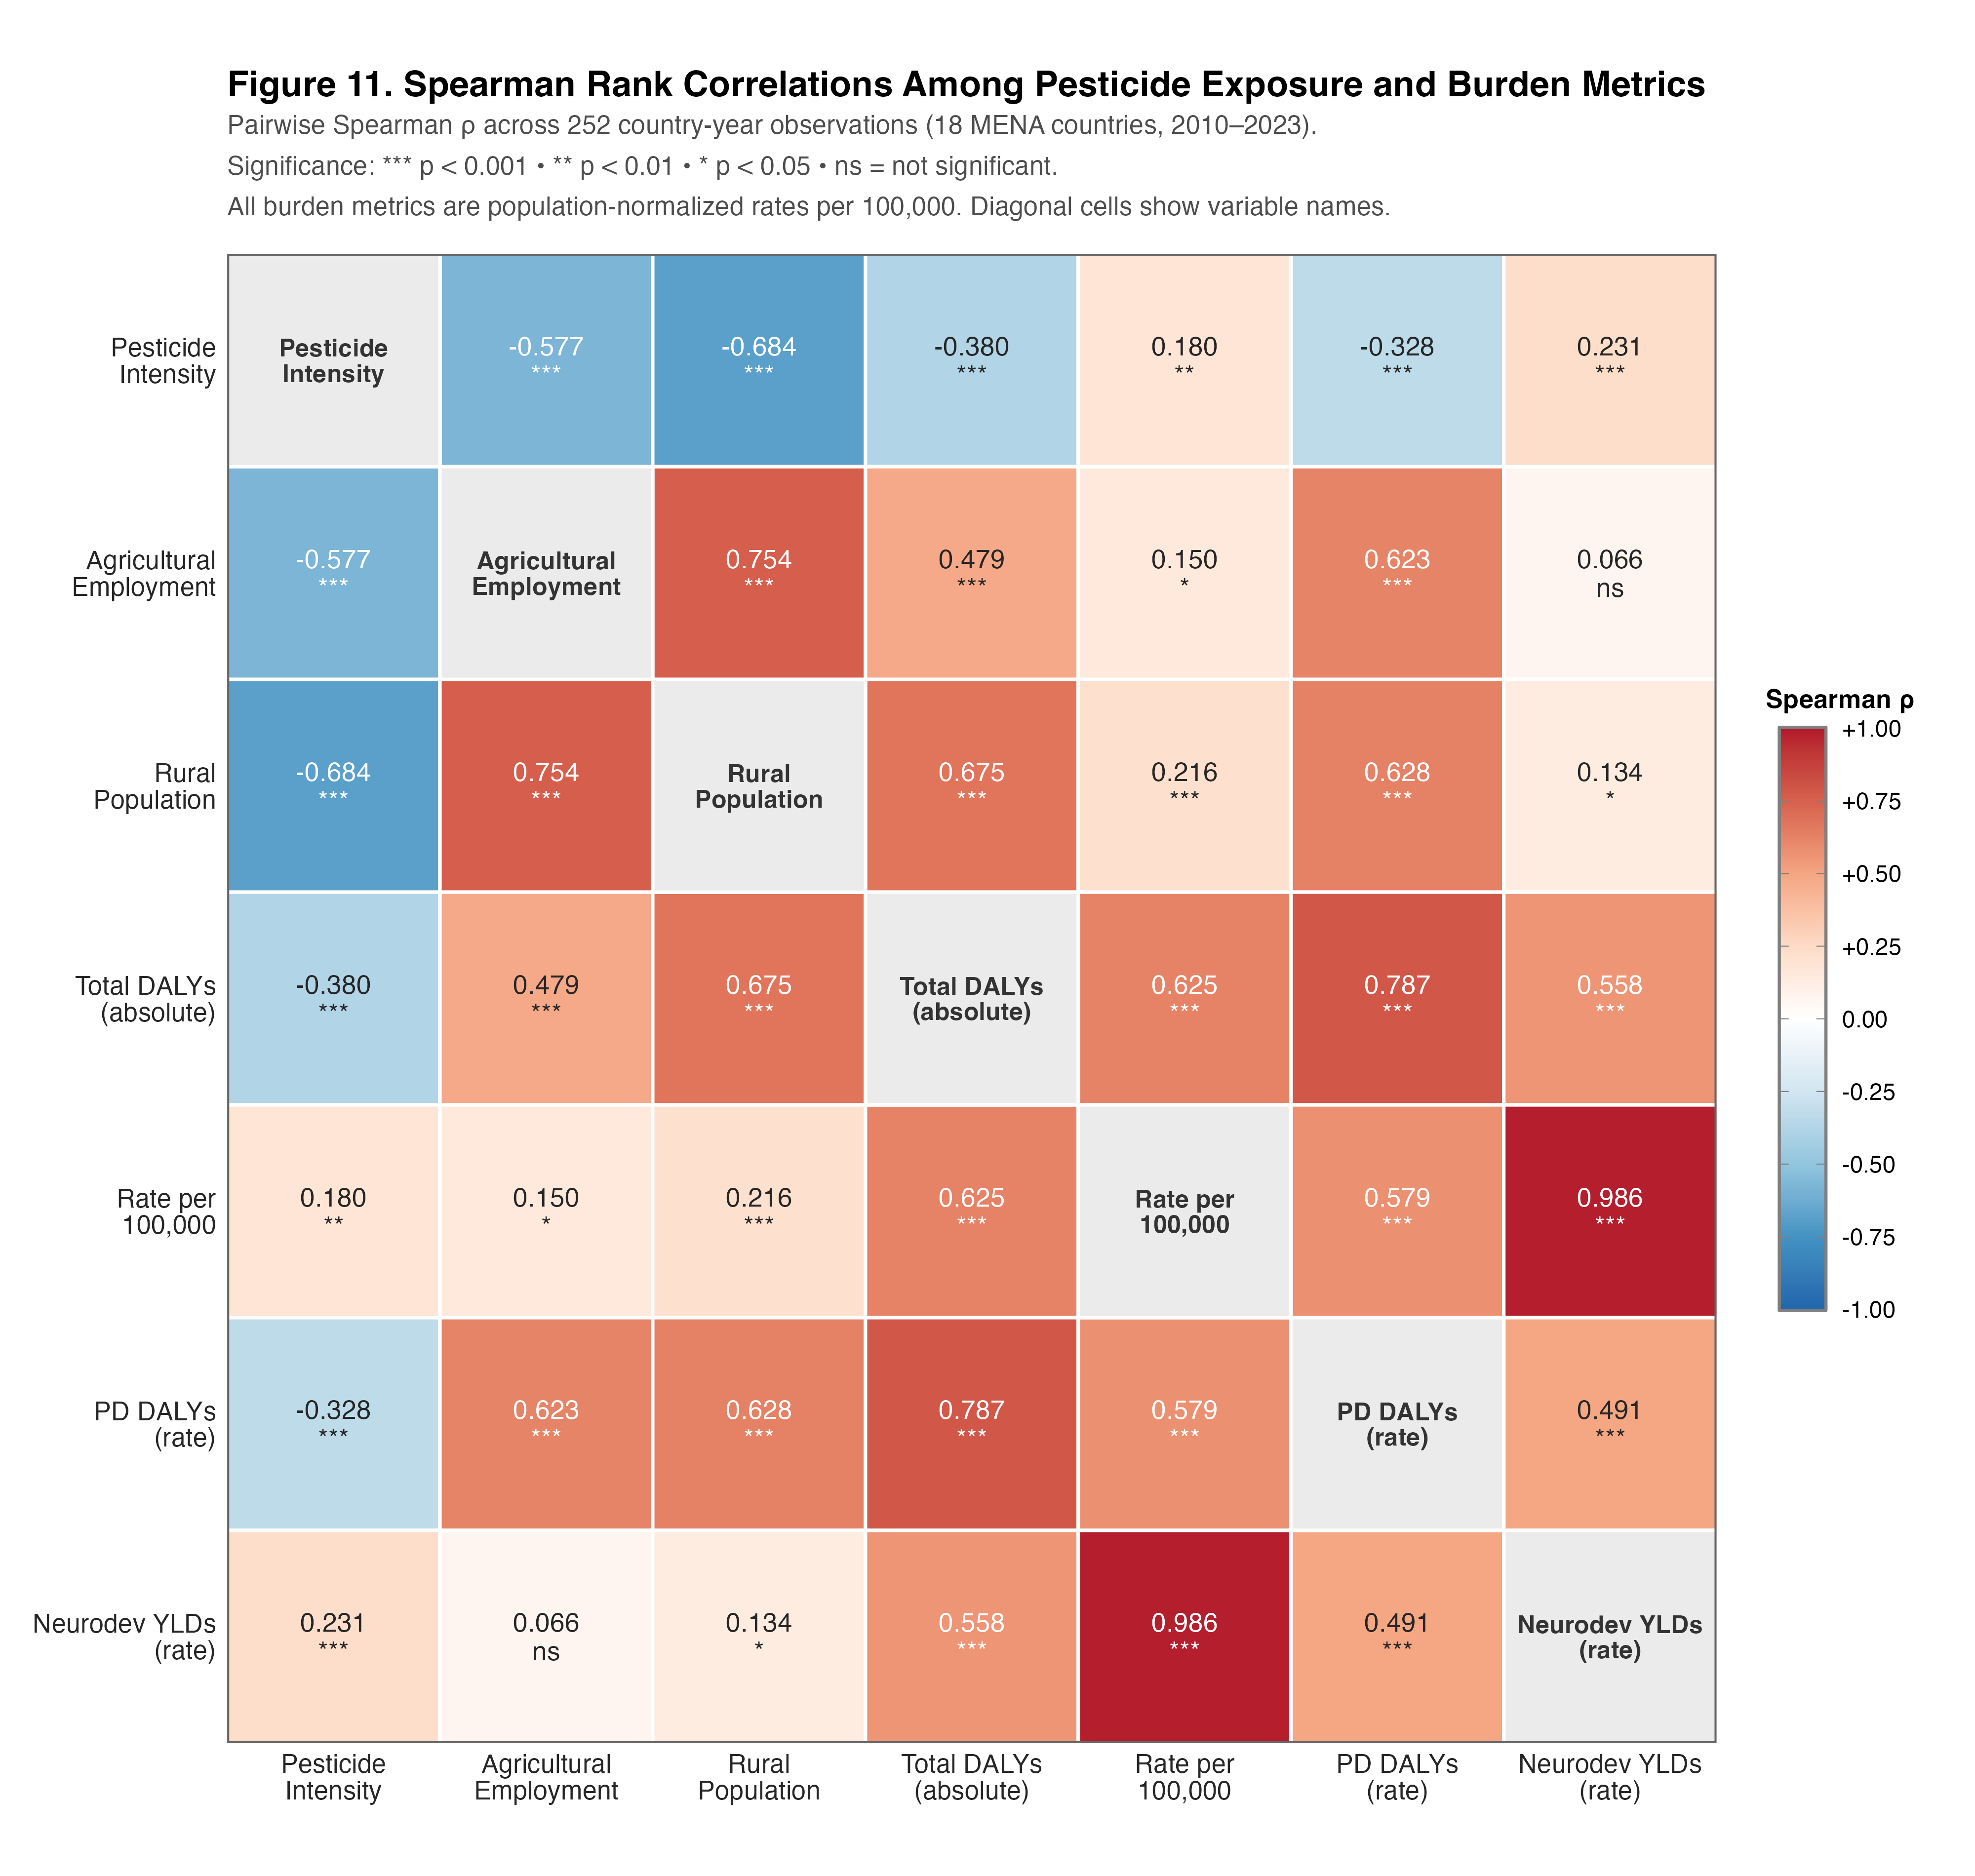


***Supplementary Figure 2****.* ***Spearman Rank Correlations Among Independent Pesticide Exposure and Burden Metrics Across MENA Countries, 2010–2023.****Full 7×7 symmetric heatmap of pairwise Spearman rank correlation coefficients (ρ) computed from 252 country-year observations (18 MENA countries × 14 years). Colour intensity represents correlation strength and direction: red indicates positive associations, blue indicates negative associations, and white indicates near-zero correlation. Numeric values show Spearman ρ with significance indicators (*** p < 0.001, ** p < 0.01, * p < 0.05, ns = not significant). Diagonal cells display variable names. All burden metrics are population-normalized rates per 100,000 to control for country size differences.*


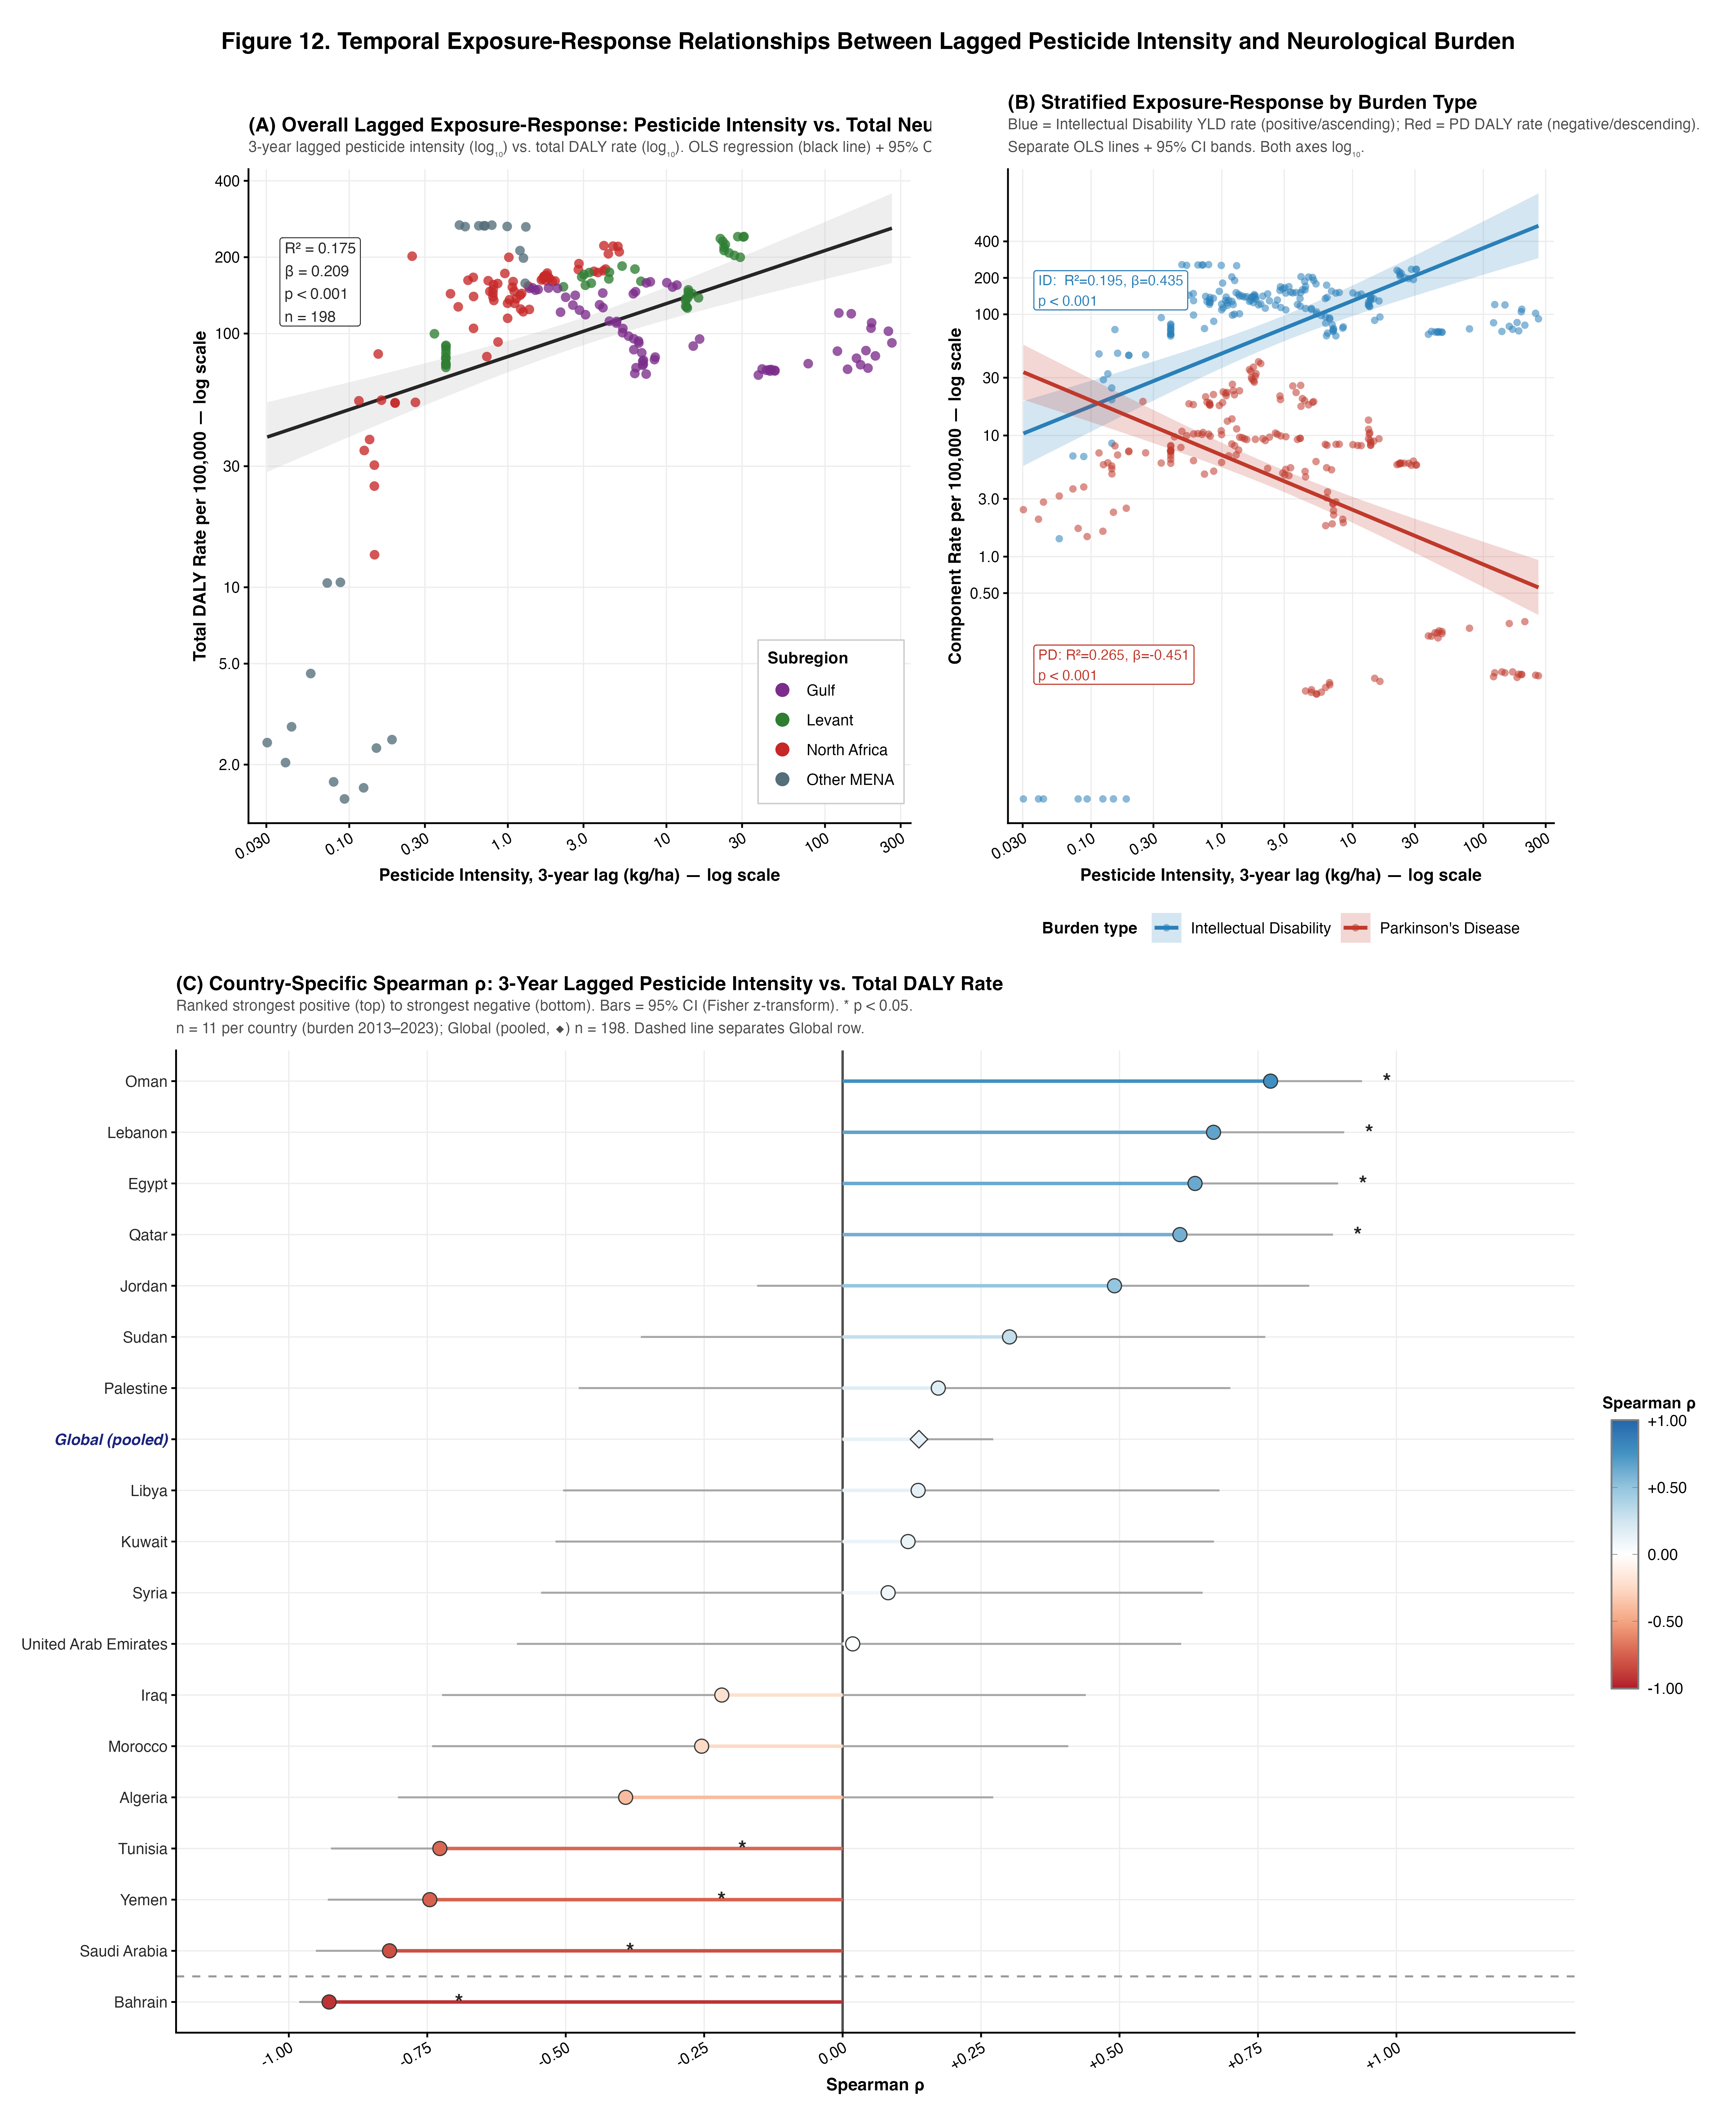


***Supplementary Figure 3. Temporal Exposure-Response Relationships Between 3-Year Lagged Pesticide Intensity and Neurological Burden Across MENA Countries, 2010–2023.****(A) Overall log-log scatter plot of 3-year lagged pesticide application intensity (kg/ha) versus total age-standardized neurological DALY rate per 100,000, across 198 country-year observations (18 MENA countries, burden years 2013–2023). Points are coloured by subregion; the black line represents the OLS log-linear regression fit with 95% confidence interval (grey shading). (B) Stratified exposure-response relationships for the two neurological burden components: intellectual disability YLD rate (blue, positive slope) and Parkinson's disease DALY rate (red, negative slope), each with separate OLS regression lines and 95% confidence bands on log-log axes. (C) Country-specific Spearman rank correlations (ρ) between 3-year lagged pesticide intensity and total DALY rate, computed within each country across 11 year-pairs (burden 2013–2023); the Global (pooled) row uses all 198 observations. Countries are ranked from strongest positive (top) to strongest negative (bottom); horizontal bars represent 95% confidence intervals via Fisher z-transformation; points are coloured by ρ value (red = positive, blue = negative). * p < 0.05 (two-sided). The dashed horizontal line separates individual country rows from the Global (pooled) row (diamond symbol).*


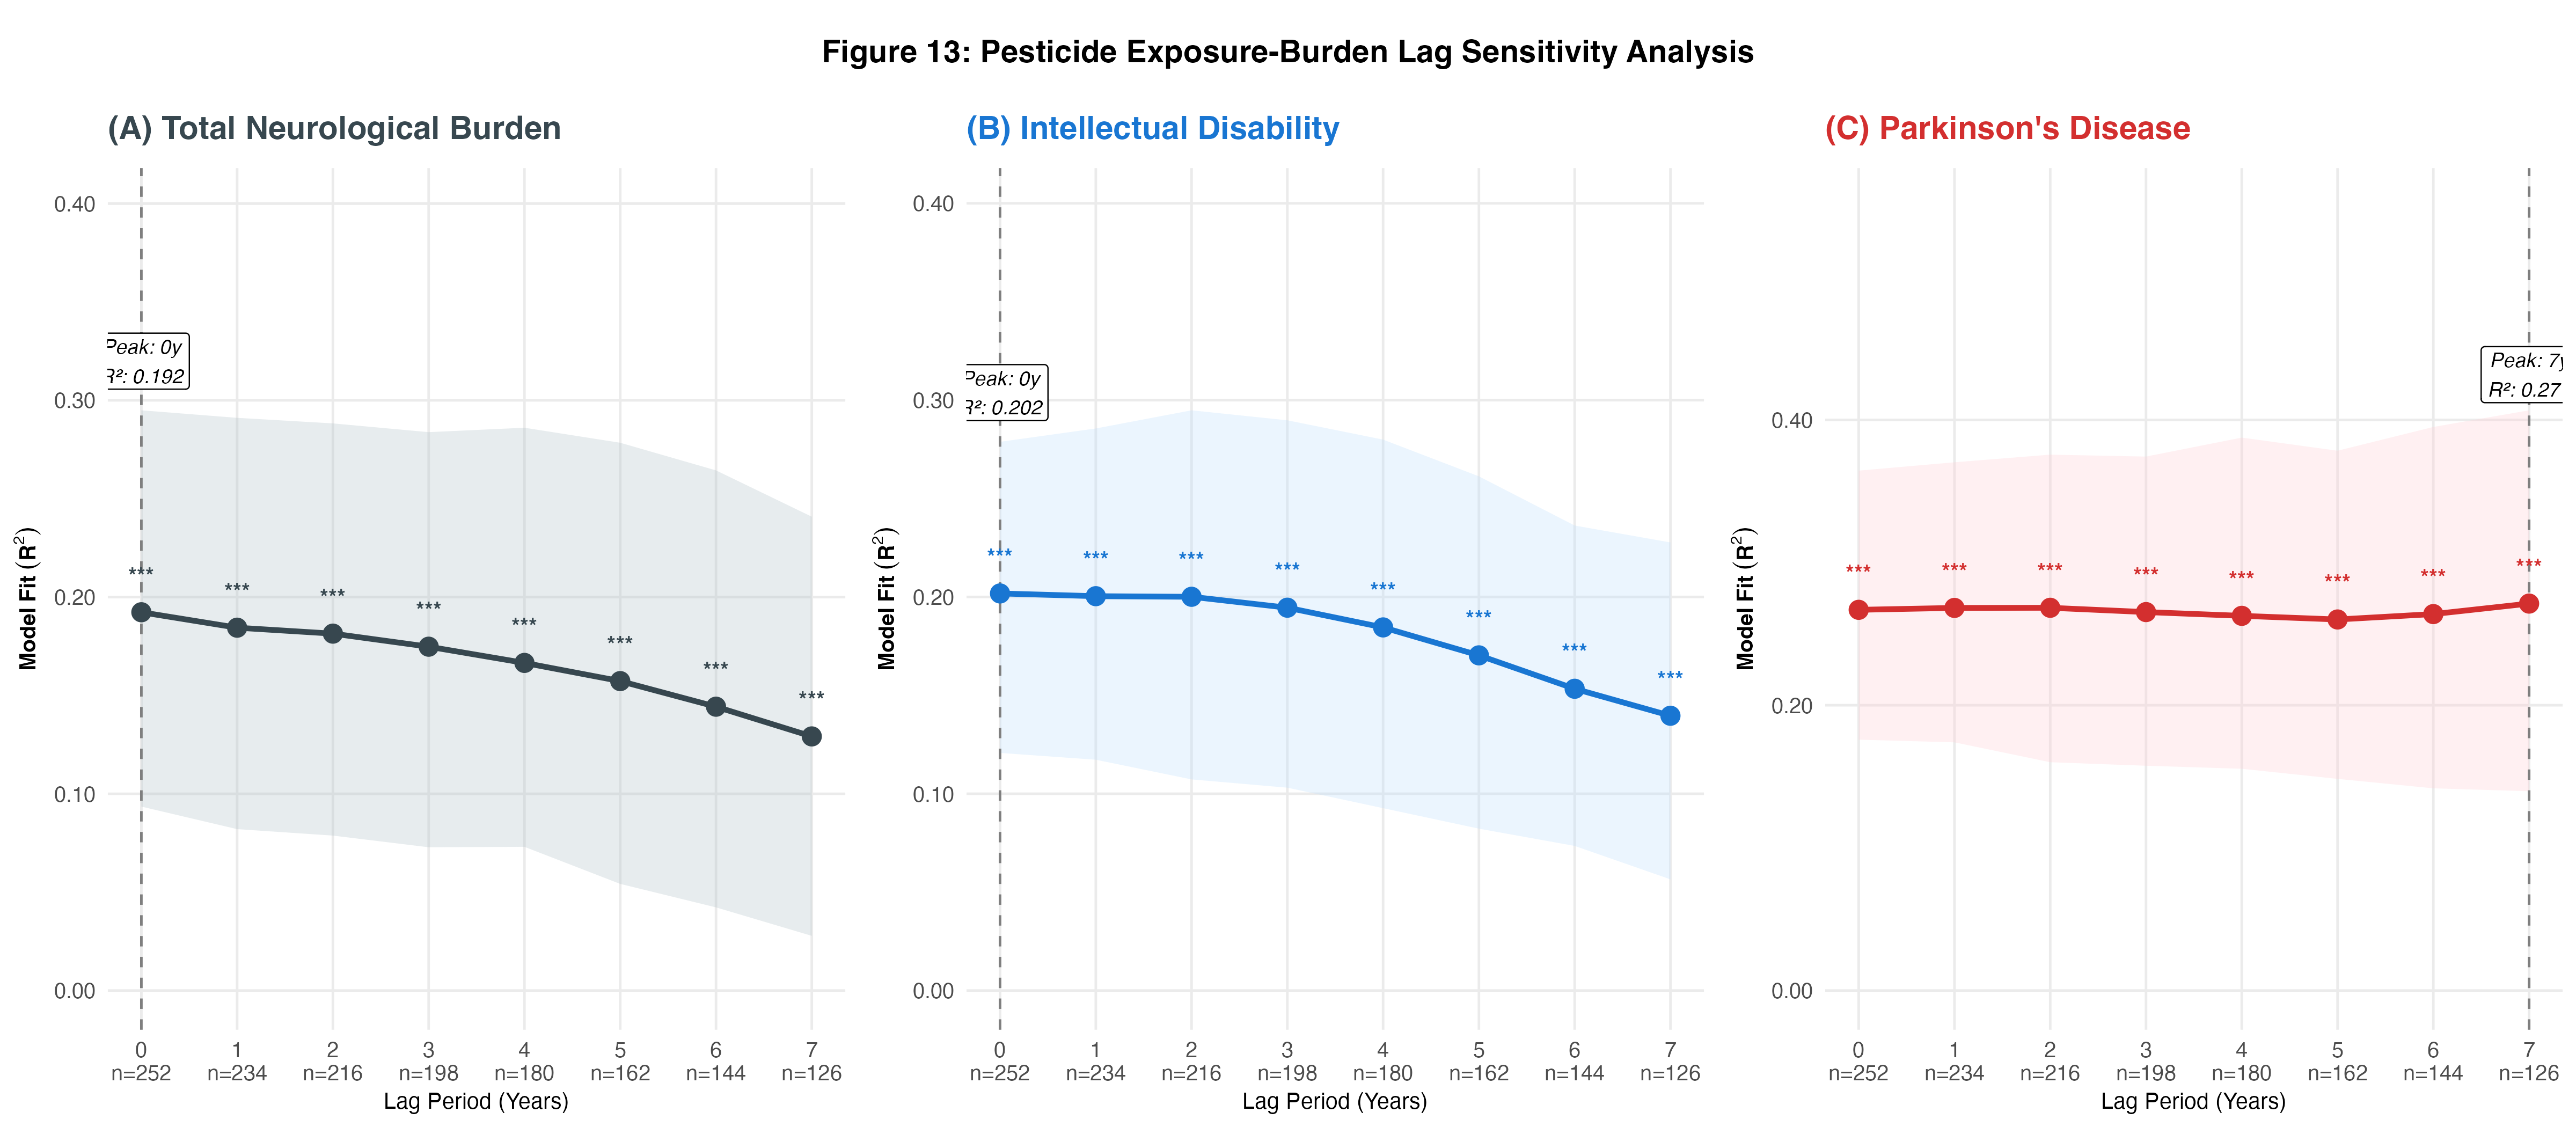


***Supplementary Figure 4. Lag Sensitivity Analysis: Model Fit (R²) by Exposure Lag Period.****R² from log-linear OLS regression of lagged pesticide application intensity versus neurological burden rate across 18 MENA countries, 2010–2023, for three burden outcomes: (A) total neurological DALY rate (dark grey), (B) intellectual disability YLD rate (blue), and (C) Parkinson's disease DALY rate (red). Each point represents the R² at a given lag (0–7 years), with shaded bands showing 95% bootstrap confidence intervals (B = 999, seed = 2024). Sample sizes decrease with increasing lag (n = 252 at lag 0 to n = 126 at lag 7) as matched country-year pairs are lost at each end of the study window. Dashed vertical lines mark the lag period yielding maximum R² for each outcome. Significance of each regression: *** p < 0.001, ** p < 0.01, * p < 0.05.*

*
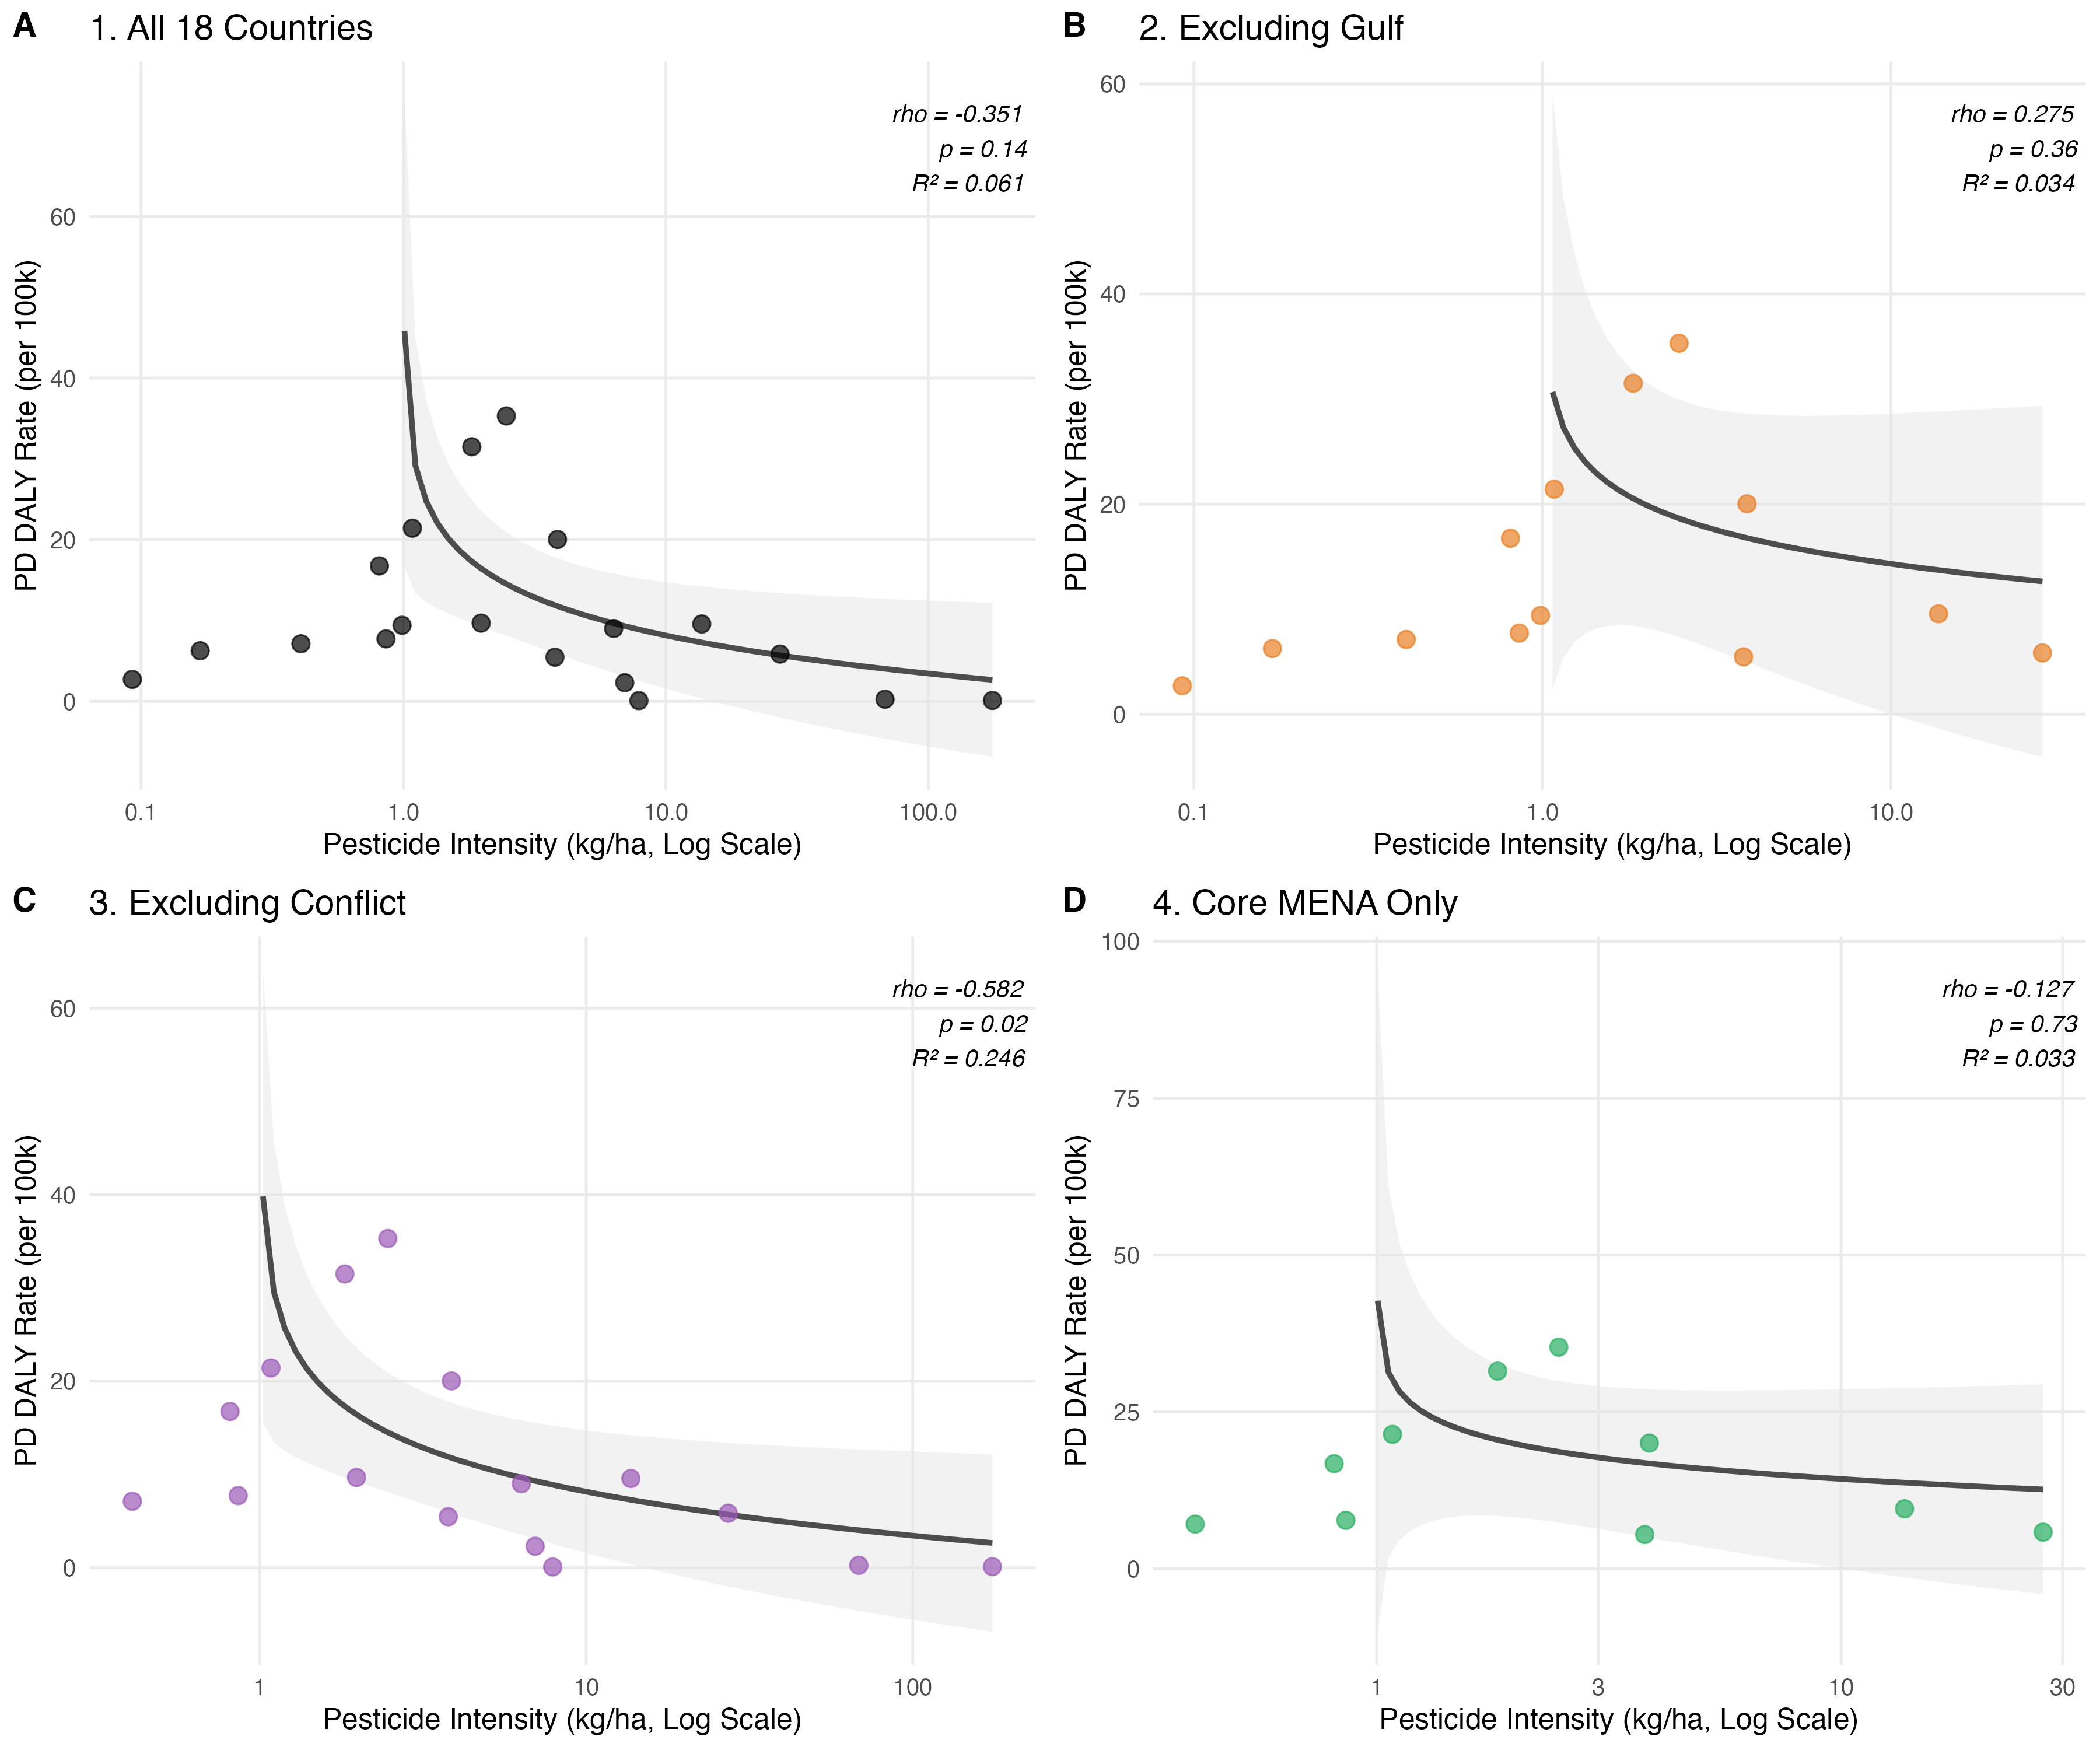
*

***Supplementary Figure 5. Sensitivity Analysis of Parkinson's Disease-Pesticide Intensity Relationship Across MENA Countries, 2010-2023.*** *Scatter plots display mean pesticide application intensity (kg/ha, logarithmic scale) versus mean PD burden rate (DALYs per 100,000 population) under four analysis scenarios: (A) All 18 MENA countries (n=18, ρ=-0.35, p=0.14); (B) Excluding Gulf countries (n=12, ρ=+0.28, p=0.36); (C) Excluding conflict-affected countries (n=15, ρ=-0.58, p=0.02); (D) Core MENA only—excluding both Gulf and conflict countries (n=9, ρ=-0.13, p=0.73). Points color-coded by analysis subset. Dashed trend lines show OLS regression with 95% confidence intervals (gray shading). The reversal from negative to positive correlation when excluding Gulf countries demonstrates that the inverse relationship is an artifact of agricultural mechanization patterns rather than a biological dose-response phenomenon.*
